# Supplementary material for: Associations among Heavy Metals and Proteinuria and Chronic Kidney Disease
Source: PubMed Central journal article supplement (PMC7918558; doi:10.3390/diagnostics11020282), 2021-02-11
Supplement: diagnostics-11-00282-s001.pdf [file diagnostics-11-00282-s001.pdf]

Supplement Table

Table 1. The interaction effect of Cr and Pb is associated with an increased in the risk of proteinuria occurrence

| Effect                        | OR (95% CI)             | <i>p</i> value | Log_Cr by Log_Pb,<br><i>p</i> value |
|-------------------------------|-------------------------|----------------|-------------------------------------|
| Log_Cr at Log_Pb= 0.00        | 0.37 (0.08-1.77)        | 0.212          | 0.048                               |
| Log_Cr at Log_Pb= 0.10        | 0.48 (0.13-1.84)        | 0.285          |                                     |
| Log_Cr at Log_Pb= 0.15        | 0.55 (0.16-1.88)        | 0.343          |                                     |
| Log_Cr at Log_Pb= 0.20        | 0.63 (0.21-1.94)        | 0.423          |                                     |
| Log_Cr at Log_Pb= 0.25        | 0.72 (0.26-2.01)        | 0.535          |                                     |
| Log_Cr at Log_Pb= 0.30        | 0.83 (0.32-2.11)        | 0.692          |                                     |
| Log_Cr at Log_Pb= 0.35        | 0.95 (0.40-2.24)        | 0.901          |                                     |
| Log_Cr at Log_Pb= 0.40        | 1.08 (0.49-2.40)        | 0.843          |                                     |
| Log_Cr at Log_Pb= 0.45        | 1.24 (0.58-2.63)        | 0.575          |                                     |
| Log_Cr at Log_Pb= 0.50        | 1.42 (0.68-2.95)        | 0.348          |                                     |
| Log_Cr at Log_Pb= 0.55        | 1.62 (0.78-3.38)        | 0.196          |                                     |
| Log_Cr at Log_Pb= 0.60        | 1.86 (0.87-3.97)        | 0.110          |                                     |
| Log_Cr at Log_Pb= 0.65        | 2.13 (0.95-4.77)        | 0.067          |                                     |
| <b>Log_Cr at Log_Pb= 0.70</b> | <b>2.43 (1.02-5.83)</b> | <b>0.046</b>   |                                     |
| Log_Cr at Log_Pb= 0.75        | 2.78 (1.07-7.22)        | 0.035          |                                     |
| Log_Cr at Log_Pb= 0.80        | 3.19 (1.12-9.05)        | 0.030          |                                     |
| Log_Cr at Log_Pb= 0.85        | 3.65 (1.16-11.44)       | 0.027          |                                     |
| Log_Cr at Log_Pb= 0.90        | 4.17 (1.20-14.55)       | 0.025          |                                     |
| Log_Cr at Log_Pb= 0.95        | 4.77 (1.23-18.59)       | 0.024          |                                     |
| Log_Cr at Log_Pb= 1.00        | 5.46 (1.25-23.85)       | 0.024          |                                     |
| Log_Cr at Log_Pb= 1.05        | 6.25 (1.27-30.68)       | 0.024          |                                     |
| Log_Cr at Log_Pb= 1.10        | 7.15 (1.29-39.57)       | 0.024          |                                     |

The odds ratio [OR] and 95% CI were estimated by a logistic regression model.

The ODDSRATIO statement produces odds ratios in the presence of interactions, and a graphical display of the requested odds ratios is produced when ODS Graphics is enabled.

Table 2. The interaction effect of Cu and Cd is associated with an increased in the risk of proteinuria occurrence

| Effect                 | OR (95% CI)      | <i>p</i> value | Log_Cr by Log_Pb, <i>p</i> value |
|------------------------|------------------|----------------|----------------------------------|
| Log_Cu at Log_Cd= -1.8 | 1.59 (1.15-2.20) | 0.005          | 0.033                            |
| Log_Cu at Log_Cd= -1.6 | 1.66 (1.24-2.21) | < 0.001        |                                  |
| Log_Cu at Log_Cd= -1.4 | 1.73 (1.34-2.23) | < 0.001        |                                  |
| Log_Cu at Log_Cd= -1.2 | 1.80 (1.44-2.24) | < 0.001        |                                  |
| Log_Cu at Log_Cd= -1.0 | 1.87 (1.55-2.26) | < 0.001        |                                  |
| Log_Cu at Log_Cd= -0.8 | 1.95 (1.67-2.28) | < 0.001        |                                  |
| Log_Cu at Log_Cd= -0.6 | 2.03 (1.78-2.31) | < 0.001        |                                  |
| Log_Cu at Log_Cd= -0.4 | 2.12 (1.90-2.36) | < 0.001        |                                  |
| Log_Cu at Log_Cd= -0.2 | 2.20 (2.00-2.43) | < 0.001        |                                  |
| Log_Cu at Log_Cd= 0.0  | 2.30 (2.08-2.54) | < 0.001        |                                  |
| Log_Cu at Log_Cd= 0.2  | 2.39 (2.13-2.69) | < 0.001        |                                  |
| Log_Cu at Log_Cd= 0.4  | 2.49 (2.16-2.87) | < 0.001        |                                  |
| Log_Cu at Log_Cd= 0.6  | 2.59 (2.19-3.07) | < 0.001        |                                  |
| Log_Cu at Log_Cd= 0.8  | 2.70 (2.21-3.30) | < 0.001        |                                  |
| Log_Cu at Log_Cd= 1.0  | 2.81 (2.23-3.56) | < 0.001        |                                  |
| Log_Cu at Log_Cd= 1.2  | 2.93 (2.24-3.84) | < 0.001        |                                  |
| Log_Cu at Log_Cd= 1.4  | 3.05 (2.25-4.14) | < 0.001        |                                  |
| Log_Cu at Log_Cd= 1.6  | 3.18 (2.26-4.47) | < 0.001        |                                  |
| Log_Cu at Log_Cd= 1.8  | 3.31 (2.28-4.82) | < 0.001        |                                  |

The odds ratio [OR] and 95% CI were estimated by a logistic regression model.

The ODDS RATIO statement produces odds ratios in the presence of interactions, and a graphical display of the requested odds ratios is produced when ODS Graphics is enabled.
